# Supplementary material for: A Bayesian analysis of the association between Leukotriene A4 Hydrolase genotype and survival in tuberculous meningitis
Source: eLife. 2021 Jan 8;10:e61722. doi: 10.7554/eLife.61722 (PMC7793626; doi:10.7554/eLife.61722)
Supplement: Source data 1. [file elife-61722-data1.xlsx]

## Sheet: Indonesia HIV neg
Data from DOI: https://doi.org/10.1093/infdis/jix051							Arjan van Laarhoven, Sofiati Dian, Carolien Ruesen, Ela Hayati, Michelle S M A Damen, Jessi Annisa, Lidya Chaidir, Rovina Ruslami, Tri Hanggono Achmad, Mihai G Netea, Bachti Alisjahbana, Ahmad Rizal Ganiem, Reinout van Crevel
PatientID	GCS	TBM grade	Age	Outcome	length_of_followup	LTA4H_rs17525495	J Infect Dis. 2017 Apr 1;215(7):1029-1039. Clinical Parameters, Routine Inflammatory Markers, and LTA4H Genotype as Predictors of Mortality Among 608 Patients With Tuberculous Meningitis in Indonesia. PMID: 28419315
900077	13	2	45	Alive	214	TT
900083	15	1	23	Alive	203	CC
900084	15	1	35	Dead	89	CC
900089	14	2	30	Dead	1	CT
900091	14	2	90	Dead	1	CC
900093	11	2	49	Dead	26	TT
900094	10	3	40	Dead	4	TT
900095	15	2	30	Alive	187	CC
900102	15	1	23	Alive	168	CC
900104	14	2	30	Alive	271	CT
900105	15	2	25	Alive	271	CT
900107	14	2	49	Dead	5	CC
900110	11	2	23	Dead	3	CT
900113	13	2	55	Alive	233	CC
900114	13	2	43	Alive	229	CT
900115	10	3	25	Dead	2	CC
900119	15	2	18	Alive	199	CT
900126	12	2	19	Alive	182	CC
900130	10	3	22	Alive	167	CC
900131	6	3	25	Dead	1	CT
900132	9	3	26	Alive	365	CT
900135	15	1	19	Alive	163	CC
900138	15	1	24	Alive	143	CC
900140	15	2	21	Alive	365	TT
900142	9	3	50	Alive	129	CT
900144	15	2	31	Alive	125	CC
900150	11	2	26	Alive	90	CC
900155	8	3	37	Dead	6	CC
900157	13	2	23	Alive	87	CC
900159	15	1	40	Alive	76	CC
900160	15	2	21	Alive	76	CT
900161	15	1	33	Alive	62	CT
900164	7	3	22	Dead	3	CT
900166	15	2	33	Dead	8	CC
900169	15	2	18	Alive	365	CC
900171	10	3	38	Alive	365	CC
900173	15	2	32	Dead	120	CC
900174	10	3	20	Alive	21	CC
900176	10	3	25	Alive	365	CC
900177	15	2	34	Dead	68	CT
900178	8	3	28	Dead	6	CC
900179	10	3	22	Dead	1	CC
900180	15	1	19	Alive	365	CT
900181	11	2	21	Dead	3	CC
900183	9	3	20	Dead	18	CC
900184	11	2	27	Alive	365	CC
900185	14	2	27	Alive	365	CC
900189	14	2	26	Alive	118	CC
900190	15	2	21	Dead	114	CT
900199	15	2	21	Alive	365	TT
900201	15	2	25	Alive	365	CT
900202	15	1	19	Alive	365	CC
900203	12	2	44	Dead	96	CC
900204	7	3	40	Dead	2	CT
900206	13	2	16	Alive	78	CC
900211	13	2	26	Alive	365	CT
900244	12	2	20	Alive	365	CC
900285	10	3	31	Alive	365	CT
900295	11	2	28	Dead	61	CC
900297	14	2	36	Alive	365	CC
900298	14	2	18	Dead	96	CT
900307	15	2	44	Alive	365	CT
900312	13	2	25	Alive	365	CT
900319	11	2	21	Dead	10	CC
900323	15	1	27	Alive	365	CC
900329	9	3	27	Dead	8	CT
900331	12	2	37	Alive	365	CC
900334	11	2	50	Dead	10	CT
900336	15	1	38	Alive	365	CT
900338	14	2	25	Alive	21	CC
900343	15	1	18	Dead	139	CC
900344	13	2	23	Alive	365	CC
900345	15	2	20	Alive	365	CT
900347	13	2	30	Alive	32	CT
900349	15	1	29	Alive	365	CT
900352	15	2	21	Alive	365	CC
900361	11	2	29	Alive	365	CC
900365	13	2	46	Dead	81	CT
900366	12	2	22	Alive	25	CC
900372	9	3	19	Alive	30	CC
900374	15	2	30	Alive	365	CC
900383	13	2	24	Alive	365	CC
900387	10	3	20	Alive	365	CC
900389	15	2	22	Alive	365	CC
900390	8	3	23	Alive	18	CC
900394	11	2	38	Dead	4	CC
900397	8	3	20	Dead	229	TT
900400	13	2	28	Dead	192	CT
900401	12	2	35	Alive	365	CT
900403	10	3	64	Dead	7	CC
900406	9	3	22	Dead	22	CC
900412	15	2	26	Alive	365	CT
900413	11	2	31	Alive	365	CC
900416	11	2	21	Dead	4	CC
900417	12	2	40	Alive	365	CT
900421	12	2	36	Dead	60	CC
900423	15	2	20	Alive	365	CC
900424	15	1	29	Dead	7	CC
900428	15	2	27	Dead	85	CT
900430	12	2	27	Dead	7	CT
900431	13	2	20	Alive	365	TT
900436	14	2	26	Alive	365	CC
900437	13	2	27	Alive	365	TT
900439	14	2	16	Alive	365	CC
900440	14	2	26	Dead	7	TT
900441	12	2	21	Dead	34	TT
900443	12	2	30	Alive	365	CC
900445	15	2	18	Alive	365	CC
900446	12	2	19	Dead	7	CT
900450	11	2	22	Alive	365	CC
900459	13	2	19	Alive	365	CC
900460	14	2	20	Alive	365	CC
900462	14	2	18	Dead	13	CC
900464	9	3	28	Alive	365	CC
900466	13	2	50	Dead	5	CT
900469	12	2	47	Dead	2	CT
900472	12	2	19	Dead	9	CC
900473	13	2	30	Dead	7	CC
900477	14	2	27	Alive	365	CC
900478	15	2	29	Alive	365	CT
900480	15	2	26	Alive	365	CC
900481	13	2	49	Alive	365	CC
900484	15	2	24	Alive	365	CT
900489	15	2	44	Alive	365	CT
900490	15	1	39	Alive	365	CT
900498	15	1	37	Alive	17	CC
900515	15	2	21	Alive	365	CC
900517	13	2	23	Dead	5	CC
900520	13	2	28	Dead	5	TT
900522	15	2	19	Dead	75	CT
900526	11	2	14	Alive	365	CC
900529	15	1	18	Alive	365	CT
900530	12	2	30	Dead	1	CC
900532	14	2	30	Alive	365	CT
900533	15	1	23	Alive	365	CT
900534	15	1	23	Alive	365	CT
900535	15	1	27	Alive	365	CC
900536	14	2	18	Alive	365	CC
900543	15	2	28	Alive	365	CT
900544	10	3	14	Alive	34	CC
900548	14	2	30	Alive	365	CC
900549	15	2	25	Alive	365	CC
900552	10	3	29	Dead	47	CT
900556	15	2	23	Alive	365	CC
900557	15	2	18	Alive	365	CC
900558	14	2	55	Alive	365	CC
900559	15	2	55	Dead	4	CT
900562	15	1	44	Alive	365	CC
900563	14	2	25	Alive	365	TT
900569	15	2	16	Alive	365	CC
900573	11	2	24	Dead	1	CT
900574	13	2	28	Dead	15	CT
900576	15	2	30	Alive	365	CC
900585	14	2	37	Alive	365	TT
900586	14	2	32	Dead	4	CT
900589	14	2	38	Alive	365	TT
900590	10	3	20	Alive	365	CC
900596	14	2	43	Alive	365	CC
900597	14	2	18	Alive	365	CC
900598	14	2	15	Dead	3	CC
900599	14	2	42	Alive	365	TT
900600	14	2	42	Alive	365	CC
900601	13	2	20	Dead	7	CT
900602	14	2	33	Alive	15	CC
900603	15	2	18	Dead	53	CC
900605	13	2	41	Alive	365	CC
900606	15	2	30	Alive	365	CC
900607	12	2	44	Dead	6	CC
900609	13	2	24	Alive	365	TT
900611	13	2	23	Dead	3	CC
900612	14	2	35	Dead	32	CC
900614	14	2	55	Dead	18	CC
900618	15	1	27	Alive	365	CC
900619	15	2	48	Alive	365	CT
900622	12	2	17	Alive	365	TT
900623	14	2	52	Alive	1	CT
900625	14	2	21	Alive	365	CT
900626	13	2	34	Dead	354	CC
900629	15	2	29	Dead	18	CC
900630	14	2	28	Alive	365	CT
900633	14	2	30	Dead	4	CC
900636	14	2	36	Alive	365	CT
900637	14	2	28	Dead	4	CT
900639	14	2	17	Alive	365	CC
900645	15	2	37	Alive	365	CC
900650	15	2	30	Alive	365	CT
900651	13	2	66	Alive	365	CT
900654	15	1	37	Dead	123	CC
900655	13	2	26	Alive	365	CC
900656	15	2	17	Alive	365	CC
900658	13	2	74	Dead	3	CT
900665	15	2	29	Dead	6	CC
900666	13	2	35	Dead	244	CT
900669	15	2	28	Alive	365	CC
900671	13	2	28	Alive	365	CT
900676	15	2	22	Alive	365	CT
900677	13	2	70	Alive	365	CC
900680	14	2	29	Dead	13	CC
900682	15	2	31	Alive	365	CT
900690	15	2	37	Alive	365	CT
900701	13	2	46	Alive	365	CC
900703	14	2	33	Alive	365	CC
900706	12	2	21	Dead	5	CC
900711	13	2	19	Alive	365	CT
900716	13	2	24	Alive	22	CC
900723	13	2	67	Alive	365	CT
900726	15	2	56	Alive	365	CC
900731	15	2	21	Dead	44	CT
900746	14	2	33	Dead	77	CC
900748	14	2	48	Dead	3	CC
900749	15	2	19	Dead	15	CC
900751	15	2	27	Alive	365	CC
900758	15	2	44	Alive	365	CT
900760	13	2	16	Dead	5	CC
900762	14	2	31	Dead	7	CT
900767	15	1	16	Alive	365	CC
900768	15	2	46	Alive	365	TT
900776	15	2	35	Dead	7	CT
900779	13	2	40	Alive	365	CT
900786	13	2	70	Dead	10	CC
900791	13	2	31	Alive	365	CC
900793	14	2	36	Alive	365	CC
900796	15	1	23	Alive	365	CC
900799	15	2	31	Dead	8	CC
900800	13	2	38	Dead	3	CC
900803	15	1	22	Alive	365	CT
900805	14	2	23	Alive	365	CT
900808	10	3	46	Dead	1	CC
900810	14	2	46	Alive	365	CC
900812	14	2	35	Dead	2	CC
900816	15	2	18	Alive	365	CC
900824	15	2	37	Alive	365	CC
900828	13	2	20	Alive	365	CT
900835	13	2	23	Dead	94	TT
900841	12	2	22	Alive	365	TT
900842	11	2	17	Alive	365	CT
900845	14	2	48	Alive	365	CC
900847	15	2	49	Alive	365	CT
900849	13	2	17	Alive	365	CC
900855	12	2	38	Alive	359	CT
900857	14	2	67	Alive	365	CC
900860	11	2	29	Alive	365	CC
900864	15	2	27	Alive	365	CT
900868	9	3	29	Dead	29	CC
900875	7	3	26	Dead	2	CC
900877	9	3	44	Dead	54	CC
900879	9	3	33	Alive	365	CC
900889	11	2	58	Alive	365	CC
900891	9	3	20	Dead	4	TT
900892	12	2	55	Dead	3	CC
900895	14	2	47	Dead	5	CT
900896	15	1	37	Alive	365	CC
900969	10	3	37	Alive	365	CC
900972	12	2	28	Dead	20	CT
900973	8	3	22	Dead	2	CC
900974	15	1	45	Dead	84	CT
1300002	13	2	30	Alive	365	TT
1300003	9	3	21	Alive	365	CT
1300005	15	2	30	Alive	365	CT
1300009	15	2	27	Alive	365	CC
1300012	14	2	44	Alive	361	TT
1300017	9	3	46	Dead	5	CC
1300018	6	3	24	Alive	34	CC
1300019	11	2	26	Alive	365	CT
1300024	14	2	34	Alive	365	CT
1300030	15	2	48	Dead	6	CT
1300031	8	3	29	Dead	9	CC
1300033	11	2	38	Dead	157	CC
1300035	14	2	26	Alive	365	CT
1300037	12	2	19	Dead	106	CC
1300038	15	2	30	Alive	365	CT
1300040	6	3	29	Dead	11	CT
1300041	11	2	31	Alive	360	CC
1300042	15	2	47	Alive	360	CT
1300045	11	2	32	Alive	360	CT
1300047	13	2	23	Dead	2	CC
1300050	13	2	23	Dead	135	CT
1300052	11	2	45	Dead	1	CT
1300053	9	3	20	Alive	365	CT
1300054	11	2	30	Dead	1	CC
1300056	13	2	55	Alive	183	CC
1300063	10	3	38	Dead	87	CC
1300064	11	2	45	Dead	18	CC
1300067	10	3	47	Alive	181	TT
1300071	11	2	38	Alive	188	TT
1300074	15	1	25	Alive	186	CT
1300075	15	2	24	Alive	192	CC
1300076	13	2	21	Dead	91	CT
1300079	11	2	36	Dead	94	CC
1300082	12	2	21	Alive	185	CC
1300085	12	2	23	Alive	180	CC
1300086	12	2	40	Alive	178	CC
1300089	11	2	31	Dead	5	CT
1300092	10	3	17	Dead	3	TT
1300093	13	2	49	Alive	182	CC
1300096	13	2	47	Alive	181	CC
1300104	13	2	52	Dead	45	CC
1300105	13	2	22	Alive	187	CC
1300108	7	3	41	Dead	3	CC
1300113	13	2	14	Dead	162	CC
1300118	13	2	33	Alive	181	CT
1300122	13	2	18	Alive	179	CT
1300126	13	2	29	Alive	181	CC
1300127	15	1	35	Alive	180	CC
1300131	13	2	30	Dead	34	CC
1300136	9	3	20	Alive	360	CT
1300138	13	2	25	Dead	54	CT
1300142	8	3	25	Dead	3	CC
1300147	12	2	56	Dead	8	CT
1300149	15	2	17	Alive	181	CC
1300151	15	1	30	Alive	360	TT
1300152	14	2	20	Alive	360	CC
1300154	13	2	56	Dead	7	CC
1300158	6	3	34	Dead	11	CT
1300162	10	3	33	Dead	15	CC
1300164	9	3	17	Alive	360	CT
1300165	5	3	24	Dead	1	CC
1300167	13	2	17	Alive	182	CC
1300168	15	1	31	Alive	360	CC
1300169	15	1	19	Alive	181	CT
1300171	15	2	36	Alive	360	CC
1300172	14	2	43	Alive	360	CT
1300176	12	2	16	Alive	182	CT
1300179	8	3	24	Dead	2	CT
1300180	13	2	48	Dead	16	CC
1300181	13	2	33	Alive	181	TT
1300184	13	2	31	Alive	182	CC
1300186	14	2	16	Alive	355	CC
1300188	11	2	23	Alive	360	CC
1300190	12	2	37	Alive	360	CT
1300193	12	2	20	Dead	1	CT
1300195	11	2	74	Dead	5	CC
1300196	15	2	67	Dead	27	CC
1300198	15	1	18	Alive	362	CC
1300199	13	2	20	Dead	3	CT
1300203	15	2	27	Alive	273	CC
1300205	11	2	30	Dead	7	CC
1300206	11	2	16	Alive	360	CT
1300207	15	2	24	Dead	41	TT
1300208	13	2	35	Alive	360	CC
1300210	13	2	39	Alive	360	CC
1300211	13	2	22	Dead	161	CT
1300214	13	2	14	Dead	8	CC
1300217	14	2	40	Alive	359	CC
1300220	15	2	18	Alive	360	CC
1300223	15	2	18	Alive	365	CT
1300224	14	2	33	Dead	126	CC
1300225	13	2	14	Alive	34	CT
1300226	7	3	59	Dead	104	CT
1300228	13	2	39	Alive	181	CT
1300232	13	2	16	Alive	193	CT
1300233	12	2	20	Alive	181	CC
1300234	12	2	59	Dead	3	CC
1300238	15	2	14	Alive	356	CT
1300241	10	3	33	Alive	362	TT
1300242	9	3	31	Dead	4	TT
1300243	14	2	34	Dead	3	CC
1300244	14	2	22	Dead	2	CT
1300245	7	3	24	Dead	4	CT
1300248	12	2	20	Alive	359	CC
1300249	12	2	80	Alive	19	CT
1300251	13	2	36	Dead	111	CC
1300252	9	3	52	Alive	3	CC
1300253	14	2	22	Dead	5	CT
1300257	9	3	23	Dead	4	CC
1300260	15	2	23	Alive	363	CC
1300262	13	2	29	Alive	269	CC
1300264	12	2	28	Dead	73	TT
1300266	12	2	47	Dead	140	CC
1300267	12	2	27	Alive	3	CC
1300269	15	2	48	Dead	18	CC
1300270	14	2	31	Alive	184	CT
1300271	14	2	34	Alive	184	CC
1300273	14	2	23	Alive	271	CC
1300277	14	2	16	Dead	0	CC
1300279	15	2	20	Dead	145	CC

## Sheet: Vietnam Hospital 1 HIV neg
Data from DOI: https://doi.org/10.1093/infdis/jix050							Nguyen T T Thuong, Dorothee Heemskerk, Trinh T B Tram, Le T P Thao, Lalita Ramakrishnan, Vu T N Ha, Nguyen D Bang, Tran T H Chau, Nguyen H Lan, Maxine Caws, Sarah J Dunstan, Nguyen V V Chau, Marcel Wolbers, Nguyen T H Mai, Guy E Thwaites
PatientID	GCS	TBM grade	Age	Outcome	Length_of_followup	LTA4H_rs17525495	J Infect Dis. 2017 Apr 1;215(7):1020-1028. Leukotriene A4 Hydrolase Genotype and HIV Infection Influence Intracerebral Inflammation and Survival From Tuberculous Meningitis. PMID: 28419368 PMCID: PMC5426373
21001	15	1	28	Alive	276	CC
21002	15	1	79	Alive	276	CC
21003	15	1	59	Alive	289	CT
21004	15	1	24	Alive	272	CC
21005	15	1	73	Alive	270	CC
21006	15	1	33	Alive	271	CT
21007	15	1	24	Alive	88	CC
21008	15	1	58	Alive	271	CT
21009	15	1	21	Alive	271	CT
21010	15	1	43	Alive	270	CC
21011	15	1	23	Alive	267	CC
21012	15	1	66	Alive	267	CC
21013	15	1	37	Alive	268	CC
21014	15	1	55	Alive	272	TT
21015	15	1	37	Alive	271	CC
21016	15	1	24	Alive	270	CC
21017	15	1	25	Alive	271	CT
21018	15	1	42	Alive	278	TT
21019	15	1	18	Alive	270	CT
21020	15	1	55	Alive	273	TT
21021	15	1	27	Alive	271	TT
21022	15	1	44	Alive	271	CC
21023	15	1	25	Alive	271	CT
21024	15	1	40	Alive	271	TT
21025	15	1	27	Alive	289	CT
21026	15	1	20	Alive	271	CT
21028	15	1	74	Alive	282	CC
21029	15	1	46	Alive	269	CT
21030	15	1	26	Alive	270	CT
21031	15	1	21	Alive	271	CT
21032	15	1	24	Alive	284	TT
21033	15	1	68	Alive	271	CT
21034	15	1	23	Alive	270	TT
21035	15	1	18	Alive	272	CC
21036	15	1	69	Alive	279	CT
21037	15	1	40	Alive	272	CC
21038	15	1	40	Alive	267	CT
21039	14	2	49	Alive	271	CC
21040	15	1	31	Alive	270	CC
21041	15	1	39	Alive	270	CT
21042	15	1	57	Alive	274	CC
21043	15	2	33	Alive	266	CT
21044	15	1	47	Dead	103	CC
21045	15	2	62	Alive	271	CT
21046	15	1	49	Alive	282	CT
21047	15	1	32	Alive	274	CC
21048	15	2	49	Alive	289	CT
21049	15	1	22	Alive	271	CC
21051	15	1	46	Alive	272	CT
21052	15	1	37	Alive	270	CC
21053	15	1	22	Alive	273	CT
21054	15	1	27	Alive	274	CT
21055	15	1	26	Alive	272	CC
21056	15	2	33	Alive	269	CC
21058	15	1	34	Alive	266	TT
21059	15	1	40	Alive	267	CT
21060	15	1	53	Alive	289	CT
21061	15	2	57	Dead	98	CT
21062	15	1	26	Alive	272	CC
21063	15	1	37	Alive	271	CC
21064	15	1	18	Alive	272	CT
21065	15	1	43	Alive	269	CC
21066	15	1	50	Alive	271	CC
21067	15	1	20	Alive	272	CC
21068	15	1	62	Alive	271	CT
21069	15	1	19	Alive	270	CC
21070	14	2	62	Alive	271	CT
21071	15	1	48	Alive	267	CT
21073	7	3	70	Dead	93	CC
21074	15	1	21	Alive	270	CT
21075	15	1	41	Alive	269	CT
21076	15	1	22	Alive	269	CC
21077	15	1	41	Alive	271	CT
21078	15	2	64	Alive	269	CC
21079	15	1	56	Dead	44	CT
21080	15	1	39	Alive	269	TT
21081	15	1	39	Alive	271	CC
21082	15	2	66	Alive	271	CT
21083	15	1	47	Alive	276	CT
21084	15	1	56	Dead	53	CC
21085	15	2	58	Alive	271	CT
21086	15	1	41	Alive	4	CT
21087	15	1	23	Alive	289	CT
21089	15	1	66	Alive	270	CC
21090	15	2	48	Dead	85	CC
21091	15	1	61	Dead	8	CT
21092	15	1	49	Alive	279	CT
21094	15	1	24	Alive	270	CC
21095	15	1	39	Alive	271	CT
21096	15	1	26	Alive	270	CC
21097	14	2	63	Alive	271	TT
21098	15	2	31	Alive	272	CC
21099	14	2	54	Alive	271	TT
21100	15	1	57	Alive	270	CT
21101	15	1	38	Alive	279	CT
21102	15	1	64	Alive	274	CT
21103	7	3	43	Dead	2	CT
21104	15	2	58	Alive	271	CT
21105	15	1	47	Alive	271	CT
21106	15	1	51	Alive	272	CC
21107	15	1	43	Alive	271	CC
21108	15	2	20	Alive	289	CT
21109	13	2	47	Alive	275	TT
21110	15	1	38	Dead	26	CC
21111	15	2	68	Alive	271	CT
21112	15	1	70	Alive	272	CC
21113	15	2	63	Dead	133	CC
21114	15	1	31	Alive	274	TT
21115	15	1	66	Alive	274	CC
21116	15	1	28	Alive	289	CC
21117	15	1	85	Dead	111	CT
21118	15	1	26	Alive	274	CC
21119	15	1	25	Alive	265	CT
21120	15	1	51	Alive	271	CT
21121	15	1	39	Alive	269	CC
21122	15	1	19	Alive	271	CC
21123	15	1	36	Alive	271	CC
21124	15	1	65	Alive	272	CT
21125	15	1	55	Alive	270	TT
21126	15	1	33	Alive	268	CT
21127	15	1	82	Alive	270	CC
21128	15	2	71	Alive	270	TT
21129	15	1	33	Alive	273	CC
21130	15	1	41	Alive	273	CT
21131	15	1	70	Alive	271	CT
21132	15	1	44	Dead	245	CT
21133	15	1	21	Alive	271	CT
21134	15	1	49	Alive	266	CT
21135	15	1	22	Alive	272	CC
21136	15	1	42	Alive	271	CC
21137	15	1	63	Alive	271	CC
21138	15	1	53	Alive	271	TT
21139	15	2	65	Alive	271	CT
21140	15	1	44	Dead	274	TT
21141	15	1	34	Alive	271	TT
21142	15	2	47	Dead	107	CT
21144	15	1	25	Alive	271	CT
21145	15	1	38	Alive	272	CT
21146	15	1	43	Alive	270	TT
21147	15	1	23	Alive	273	CT
22001	11	2	61	Alive	271	TT
22003	14	2	22	Alive	271	CC
22004	11	2	81	Dead	21	CT
22006	14	2	28	Alive	280	CC
22007	15	2	31	Alive	270	CC
22008	12	2	40	Alive	102	CC
22009	15	2	60	Alive	269	CT
22010	15	2	56	Dead	52	CC
22011	15	2	50	Alive	274	TT
22012	14	2	77	Alive	272	CT
22014	15	2	40	Alive	274	CT
22015	15	2	48	Dead	114	CC
22016	15	2	60	Alive	272	CT
22017	15	2	38	Alive	270	CC
22018	15	1	38	Alive	271	CT
22019	15	2	70	Dead	7	CT
22020	7	3	76	Dead	3	CT
22021	12	2	30	Alive	271	CT
22022	14	2	74	Dead	11	CT
22023	15	2	22	Alive	274	CT
22024	13	2	71	Alive	270	TT
22025	15	2	32	Alive	268	CT
22026	13	2	39	Alive	271	CC
22027	12	2	51	Alive	270	CT
22028	14	2	83	Dead	28	CC
22029	15	2	24	Alive	271	CC
22030	10	3	25	Alive	271	CC
22031	15	2	44	Dead	13	CT
22032	13	2	77	Dead	50	CC
22033	13	2	67	Dead	11	CC
22034	13	2	36	Alive	271	CT
22035	15	2	30	Alive	270	CT
22036	14	2	51	Alive	272	TT
22037	14	2	28	Alive	271	CC
22038	15	2	59	Alive	273	CT
22039	15	2	35	Alive	289	CC
22040	15	2	44	Dead	126	CC
22041	15	2	50	Alive	273	CT
22042	14	2	68	Alive	289	CC
22043	15	2	74	Dead	48	CT
22044	14	2	55	Alive	270	CT
22045	15	2	60	Dead	137	CT
22046	15	2	46	Dead	23	CT
22047	15	1	71	Alive	269	CC
22048	14	2	44	Alive	272	CT
22049	12	2	58	Dead	14	TT
22050	15	2	64	Alive	289	CT
22051	15	2	42	Alive	270	CT
22052	15	2	20	Alive	270	CT
22055	15	2	58	Alive	269	CC
22056	13	2	53	Alive	271	CC
22057	15	2	35	Alive	271	CC
22059	15	2	36	Alive	271	CC
22060	14	2	66	Alive	216	CT
22061	14	2	47	Alive	289	CT
22062	14	2	77	Dead	109	CT
22063	15	2	32	Alive	270	CC
22064	14	2	54	Alive	272	CT
22065	14	2	31	Alive	271	CC
22066	14	2	52	Alive	271	TT
22067	13	2	26	Alive	271	CC
22068	15	2	77	Alive	271	CT
22069	13	2	56	Alive	273	CT
22070	14	2	38	Alive	268	CC
22071	13	2	80	Dead	68	CT
22072	14	2	26	Dead	183	CC
22073	15	2	29	Dead	144	CC
22074	15	2	41	Alive	271	CT
22075	15	2	58	Alive	270	CT
22076	14	2	21	Alive	266	CC
22077	13	2	53	Dead	44	CT
22078	14	2	87	Alive	287	CT
22079	15	2	41	Alive	274	CT
22080	11	2	45	Dead	92	CC
22081	13	2	41	Dead	176	CT
22082	15	2	47	Alive	273	CC
22083	13	2	72	Dead	27	CT
22086	11	2	61	Alive	272	CT
22087	13	2	45	Dead	145	CT
22088	15	2	78	Dead	23	CC
22089	15	2	59	Dead	35	CT
22090	15	2	31	Alive	268	CC
22091	12	2	76	Alive	271	CC
22092	15	2	26	Alive	272	CC
22094	15	2	18	Alive	273	CT
22095	13	2	51	Alive	271	CC
22096	14	2	84	Dead	7	CT
22097	15	2	68	Dead	5	CC
22099	15	2	46	Dead	3	TT
22100	15	2	74	Alive	268	CC
22101	11	2	76	Dead	6	CT
22102	15	2	52	Alive	271	CC
22103	13	2	75	Dead	192	CC
22104	15	2	51	Dead	24	CC
22105	13	2	70	Alive	270	CT
22106	12	2	93	Alive	271	CT
22107	15	2	35	Alive	270	CC
22108	15	2	35	Alive	270	CT
22110	14	2	23	Alive	270	CC
22111	14	2	31	Alive	271	CT
22112	15	2	67	Alive	272	CT
22113	12	2	62	Dead	62	CT
22116	12	2	20	Dead	87	CC
22117	13	2	60	Alive	271	CT
22118	15	2	77	Alive	270	CT
22119	15	2	43	Alive	271	CT
22120	13	2	27	Alive	271	CT
22121	15	2	27	Alive	273	CT
22122	15	2	32	Alive	281	CC
23001	9	3	58	Alive	271	CT
23002	9	3	40	Dead	90	CC
23003	9	3	20	Alive	271	CT
23004	10	3	18	Alive	272	CT
23005	10	3	72	Dead	9	CC
23006	12	2	54	Alive	57	CT
23007	14	2	78	Dead	35	CT
23009	10	3	50	Dead	5	CT
23010	9	3	62	Alive	271	CT
23011	9	3	56	Dead	120	CT
23012	10	3	44	Alive	271	CT
23013	8	3	41	Dead	2	CT
23014	10	3	38	Alive	57	CT
23015	7	3	55	Dead	2	CC
23016	4	3	18	Alive	289	CT
23017	8	3	21	Dead	89	CT
23018	10	3	47	Alive	271	TT
23019	3	3	35	Dead	2	CC
23020	15	2	36	Alive	272	CT
23021	5	3	52	Dead	8	CC
23022	6	3	26	Alive	275	CC
23023	7	3	60	Alive	269	CC
23024	10	3	29	Alive	269	CC
23025	10	3	52	Alive	279	TT
23026	8	3	64	Alive	271	CC
23027	6	3	43	Dead	115	CC
23028	9	3	70	Alive	275	CT
23029	9	3	18	Alive	271	CC
23031	10	3	37	Alive	268	CT
23034	4	3	19	Alive	275	CC
23035	12	2	32	Alive	271	CT
23036	9	3	26	Alive	270	CT
23037	9	3	50	Alive	271	CT
23038	10	3	38	Alive	270	CC
23039	7	3	32	Dead	8	CT
23040	7	3	28	Alive	271	CT
23041	8	3	26	Dead	6	CC
23042	6	3	36	Alive	1	CC
23043	14	2	82	Dead	245	TT
23044	13	2	48	Alive	270	CT
23046	5	3	43	Dead	1	CC

## Sheet: Vietnam Hospital 2 HIV neg
Data from DOI: https://doi.org/10.1093/infdis/jix050							Nguyen T T Thuong, Dorothee Heemskerk, Trinh T B Tram, Le T P Thao, Lalita Ramakrishnan, Vu T N Ha, Nguyen D Bang, Tran T H Chau, Nguyen H Lan, Maxine Caws, Sarah J Dunstan, Nguyen V V Chau, Marcel Wolbers, Nguyen T H Mai, Guy E Thwaites
PatientID	GCS	TBM grade	Age	Outcome	Length_of_followup	LTA4H_rs17525495	J Infect Dis. 2017 Apr 1;215(7):1020-1028. Leukotriene A4 Hydrolase Genotype and HIV Infection Influence Intracerebral Inflammation and Survival From Tuberculous Meningitis. PMID: 28419368 PMCID: PMC5426373
41001	15	1	37	Alive	272	CT
41002	15	1	23	Alive	270	CT
41003	15	1	27	Alive	271	CT
41004	15	1	23	Alive	271	CC
41005	15	1	25	Alive	271	CT
41006	15	1	47	Alive	271	CT
41007	15	1	42	Dead	139	CC
41008	15	1	48	Dead	130	CT
41009	15	1	25	Alive	270	TT
41010	15	1	38	Dead	52	CC
41011	15	1	40	Alive	269	CT
41012	15	1	44	Alive	271	CC
41013	15	1	26	Alive	267	CT
41014	15	1	25	Alive	268	TT
41015	15	1	36	Alive	271	CT
41016	15	1	26	Alive	270	CT
41017	15	1	52	Alive	267	CT
41018	15	1	58	Alive	270	CT
41019	15	1	52	Dead	7	CT
41020	15	1	22	Alive	271	CC
41021	15	1	40	Alive	269	CC
41022	15	1	37	Alive	271	CT
41023	15	1	21	Alive	271	CT
41024	15	1	19	Alive	273	CT
41025	15	1	49	Alive	271	CT
41026	15	1	40	Alive	278	CC
41027	15	1	41	Alive	268	CT
41028	15	1	24	Alive	271	CT
41029	15	1	34	Alive	269	CT
41030	15	1	33	Alive	271	TT
41031	15	1	20	Alive	268	CC
41032	15	1	21	Alive	271	CT
41033	15	1	38	Alive	270	CT
41034	15	1	28	Alive	270	CT
41035	15	1	22	Alive	268	CT
41036	15	1	40	Alive	270	CC
41038	15	1	43	Alive	271	CT
41039	15	1	21	Alive	271	CC
41040	15	1	47	Alive	274	CC
41041	15	1	53	Alive	274	CC
41042	14	2	46	Alive	271	CC
41043	15	1	46	Alive	269	CT
41044	15	1	44	Alive	271	CT
41045	15	1	47	Alive	269	CT
41046	15	1	42	Alive	271	CC
41047	15	1	18	Alive	271	CC
42001	15	2	26	Alive	271	CC
42002	15	2	45	Alive	271	TT
42003	14	2	34	Alive	271	CT
42004	15	2	31	Alive	268	CT
42005	15	2	20	Alive	289	CT
42006	13	2	26	Alive	269	CT
42007	15	2	23	Alive	271	CC
42008	13	2	21	Alive	271	CT
42009	15	2	34	Alive	271	CC
42010	11	2	50	Alive	271	CC
42011	13	2	21	Alive	272	CT
42012	14	2	28	Alive	271	CT
42013	15	2	29	Alive	270	CT
42014	14	2	35	Alive	271	TT
42015	14	2	47	Alive	269	CC
42016	15	2	41	Alive	272	CC
42017	13	2	41	Alive	270	CC
42019	15	2	48	Alive	271	TT
42020	14	2	47	Alive	270	CC
42021	13	2	30	Alive	269	CC
42022	12	2	63	Dead	125	CT
42023	13	2	56	Alive	271	CT
42024	14	2	79	Dead	12	CT
42025	14	2	35	Alive	268	CC
42026	12	2	43	Alive	270	CT
42027	11	2	24	Alive	269	CC
42028	14	2	36	Dead	7	CC
42029	13	2	53	Alive	271	CT
42030	13	2	80	Dead	94	CC
42031	11	2	63	Alive	271	CT
42032	12	2	51	Alive	269	CT
42033	13	2	50	Alive	270	CT
42034	12	2	30	Alive	269	CT
42035	14	2	43	Alive	269	CT
42036	14	2	24	Alive	271	CC
42037	14	2	46	Alive	270	CC
42038	13	2	22	Alive	269	CC
42039	12	2	65	Alive	271	CC
42040	13	2	20	Alive	269	CT
42041	11	2	59	Alive	271	CC
42042	14	2	34	Alive	270	CT
42043	13	2	64	Dead	5	CC
42044	13	2	25	Alive	271	CC
42045	13	2	27	Alive	271	CC
42046	15	2	39	Alive	271	CC
42047	14	2	43	Alive	270	TT
42048	13	2	55	Alive	269	CC
42049	12	2	33	Alive	269	CC
42050	15	2	42	Alive	271	TT
42051	14	2	61	Alive	271	CC
42052	13	2	45	Alive	271	CT
42053	11	2	29	Alive	271	CC
42054	13	2	46	Dead	10	CT
42055	15	2	21	Alive	269	CC
42056	14	2	64	Alive	271	CC
42057	13	2	27	Alive	271	CC
42058	14	2	36	Alive	270	TT
42059	13	2	49	Alive	267	CC
42060	14	2	30	Alive	269	CT
42061	14	2	33	Alive	269	CC
42062	15	2	25	Alive	271	CT
42063	13	2	37	Alive	269	CC
42064	14	2	30	Alive	271	CC
42065	11	2	60	Alive	271	CT
42066	13	2	56	Alive	271	TT
42067	14	2	50	Alive	271	TT
42068	14	2	54	Alive	270	CC
42069	15	2	32	Alive	270	CT
42070	14	2	68	Alive	271	CT
42071	12	2	50	Alive	272	CC
42072	14	2	35	Alive	271	CC
42073	14	2	18	Alive	271	CT
43001	6	3	50	Dead	3	CC
43003	10	3	18	Alive	270	TT
43005	6	3	19	Dead	25	CT
43006	10	3	43	Alive	268	CC
43007	10	3	27	Alive	269	TT
43008	8	3	23	Alive	272	CC
43009	10	3	30	Alive	263	CT
43010	8	3	22	Alive	271	CC
43011	9	3	25	Alive	269	CC
43012	6	3	18	Alive	271	CT
43013	4	3	26	Dead	44	CC
43014	4	3	43	Dead	44	CC
43015	7	3	70	Alive	270	CT
43016	4	3	20	Dead	115	CC
43017	7	3	44	Alive	270	CC
43018	8	3	30	Dead	217	CT
43019	8	3	29	Dead	6	CC
43020	8	3	33	Alive	271	CC
43021	8	3	58	Dead	70	CT
43022	10	3	30	Alive	271	CT
43023	9	3	30	Alive	275	CT
43024	7	3	30	Alive	270	CT
43025	10	3	25	Alive	270	CT
43026	10	3	30	Alive	272	CC
43027	10	3	23	Alive	272	TT
43028	9	3	26	Alive	271	CT
43029	9	3	29	Alive	271	CT
43030	7	3	86	Dead	112	CC
43031	6	3	70	Dead	46	CC
43032	6	3	33	Alive	271	CC
43033	8	3	19	Alive	271	CC
